# Supplementary material for: Single-cell sequencing on CD8+ TILs revealed the nature of exhausted T cells recognizing neoantigen and cancer/testis antigen in non-small cell lung cancer
Source: PubMed Central journal article supplement — J Immunother Cancer. 2023 Aug 6;11(8):e007180. doi: 10.1136/jitc-2023-007180 (PMC10407349; doi:10.1136/jitc-2023-007180), 2023-08-06
Supplement: jitc-2023-007180supp001.pdf [file jitc-2023-007180supp001.pdf]

## Supplementary Fig. S1

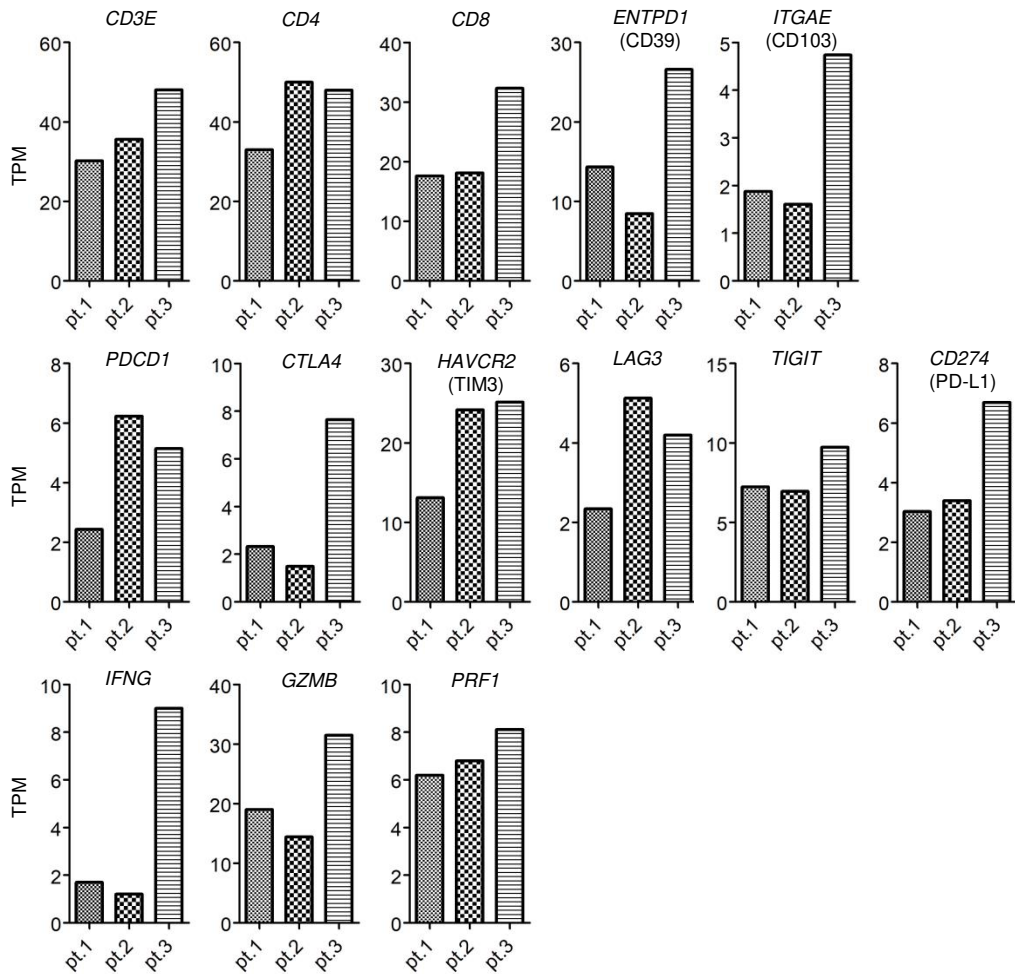**Supplementary Fig. S1. Analysis of immune-related gene expression profiles in three lung cancer patients.**

Immune cell marker, immune checkpoint molecule, and effector molecule gene expression (TPM) are compared among three patients (pt.1, pt.2 and pt.3).

## Supplementary Fig. S2

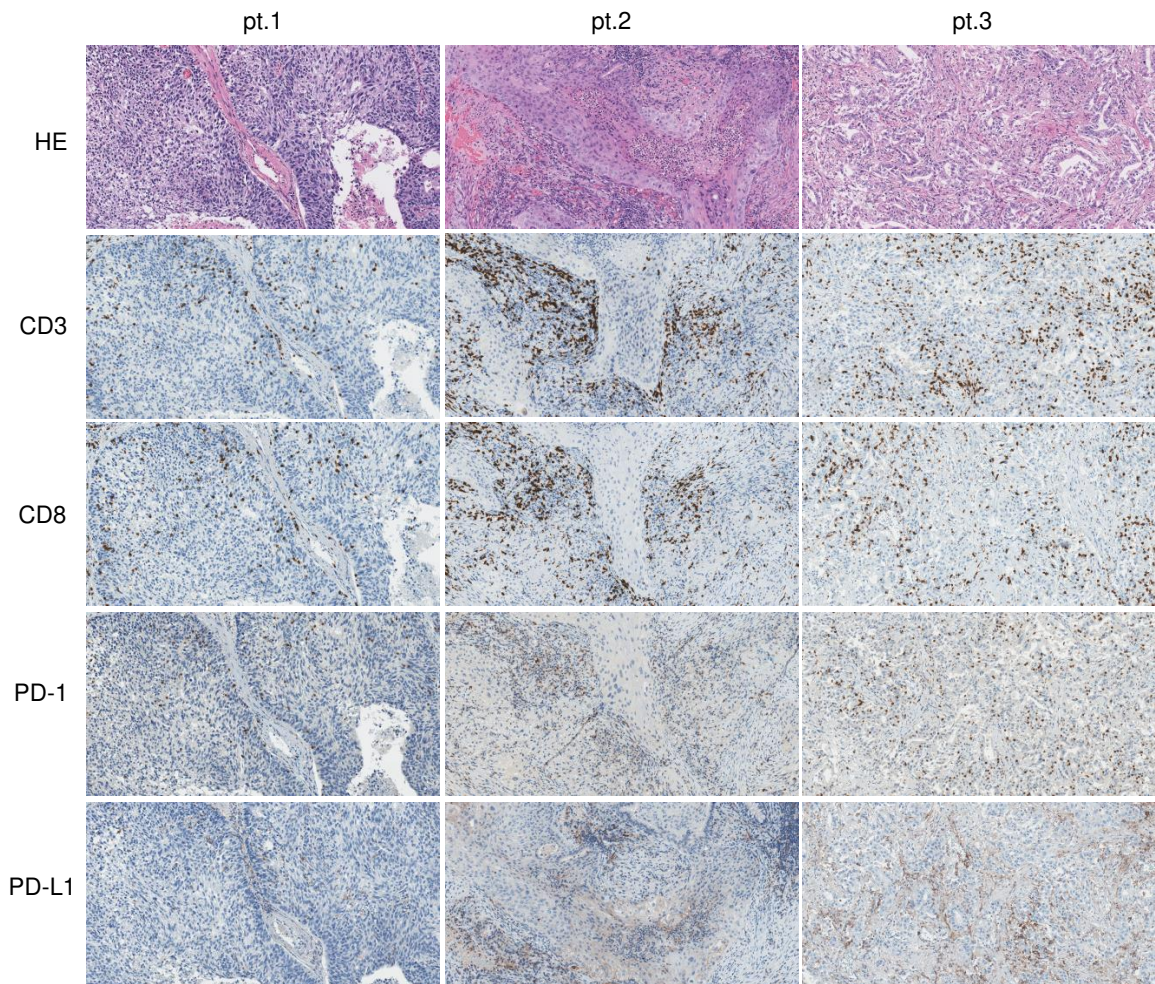**Supplementary Fig. S2. Immunohistochemistry (IHC).**

Expression of immune cell markers (CD3 and CD8) and immune checkpoint molecules (PD-1 and PD-L1) are examined by IHC in three patients (pt.1, pt.2 and pt.3).

## Supplementary Fig. S3

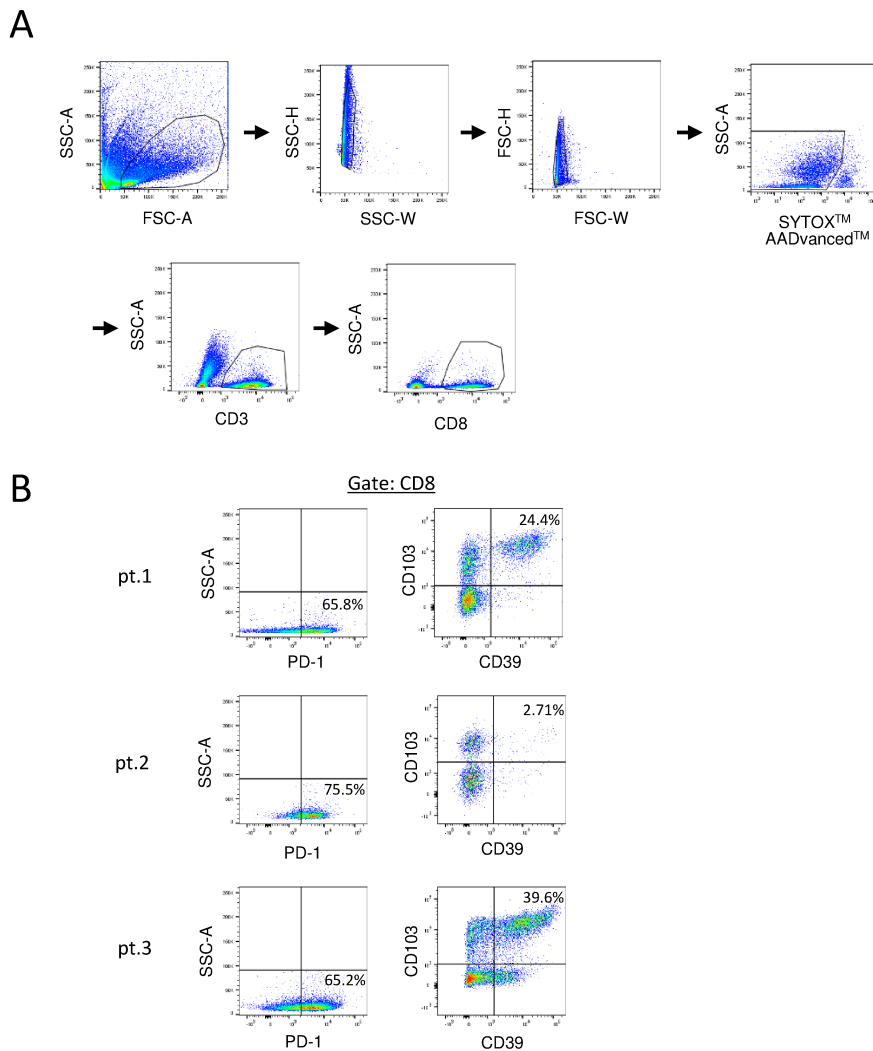**Supplementary Fig. S3. Flow cytometry gating strategy and CD8<sup>+</sup> T cell staining.**

A, The gating strategy is shown including initial gates (SSC singlet, FSC singlet, and live cells) followed by CD3<sup>+</sup> and CD8<sup>+</sup> cells. B, PD-1<sup>+</sup>CD8<sup>+</sup> T cells and CD39<sup>+</sup>CD103<sup>+</sup>CD8<sup>+</sup> T cells in each patient are shown.

## Supplementary Fig. S4

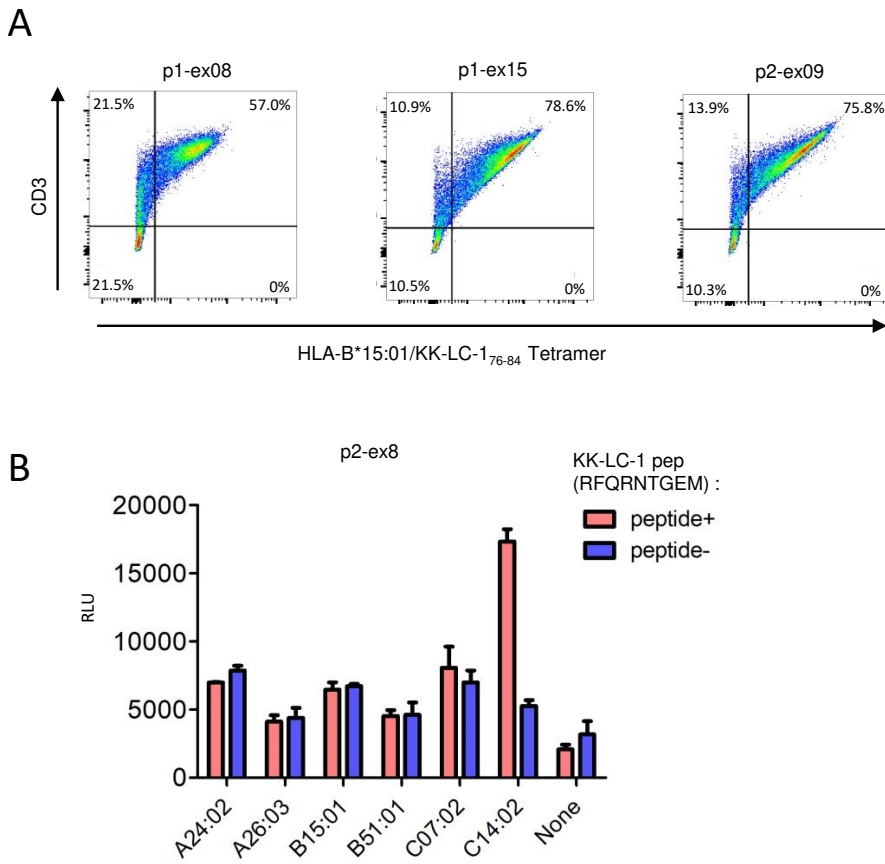**Supplementary Fig. S4. Tetramer staining and luciferase assay.**

**A**, The TCR-transduced Jurkat cells (Jurkat-TCR cells) are stained with anti-CD3 antibody and HLA-B\*15:01/KK-LC-1<sub>76-84</sub> Tetramer. **B**, HEK293T cells transduced with HLA genes in the presence or absence of antigenic peptides (10 $\mu$ g/ml) were cocultured with Jurkat-TCRs-Luc cells and activation of the NFAT gene was measured by the Steady-Glo Luciferase Assay System.

## Supplementary Fig. S5

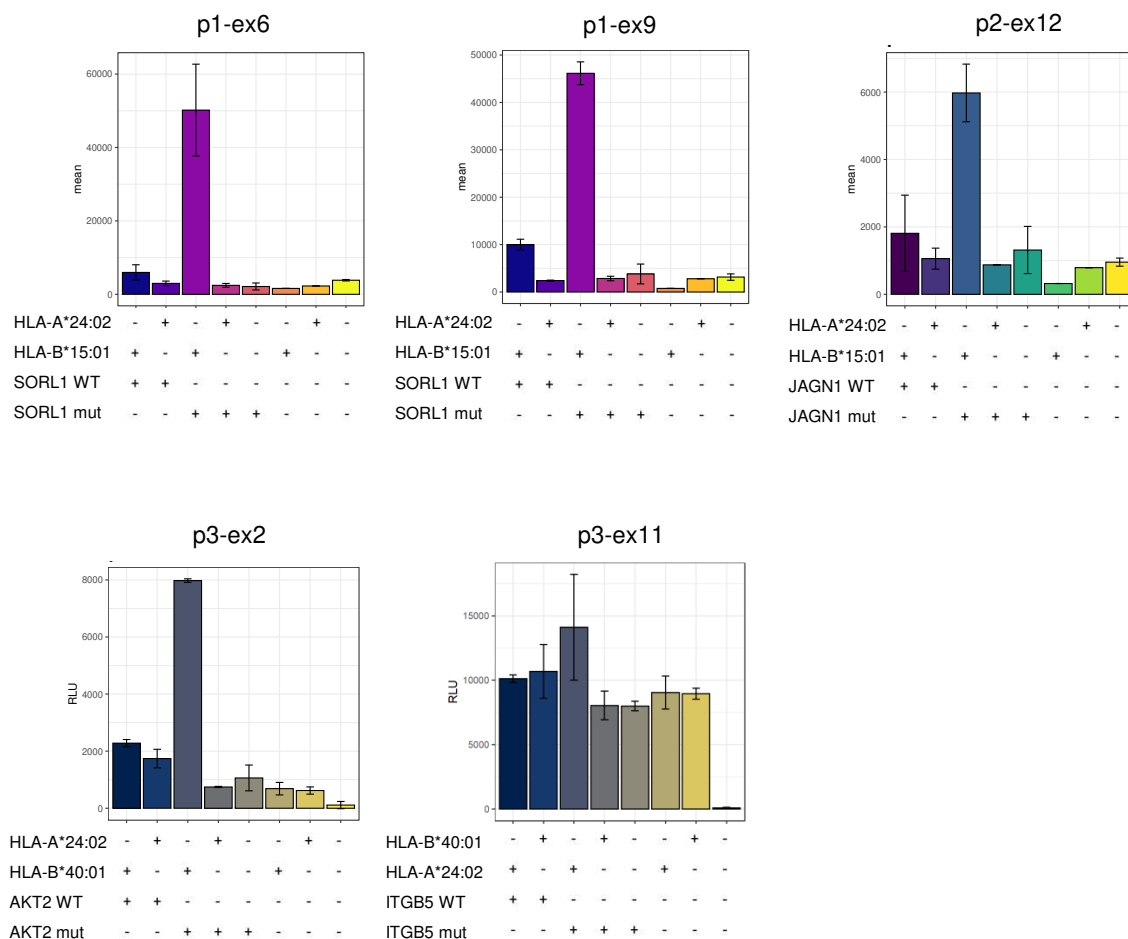

**Supplementary Fig. S5. Recognition of naturally processed peptides by Jurkat cells stably expressing TCRs (stable Jurkat-TCR cells).**

HEK293T cells were transfected with expression vectors harboring HLA genes and antigen genes with or without mutations. Post transfection, the HEK293T cells were plated with stable Jurkat-TCR cells transduced with the pGL4.30 [luc2P/NFAT-RE/Hygro] vector. After overnight incubation, activation of the NFAT gene was measured by the Steady-Glo Luciferase Assay System.



## Supplementary Fig. S6

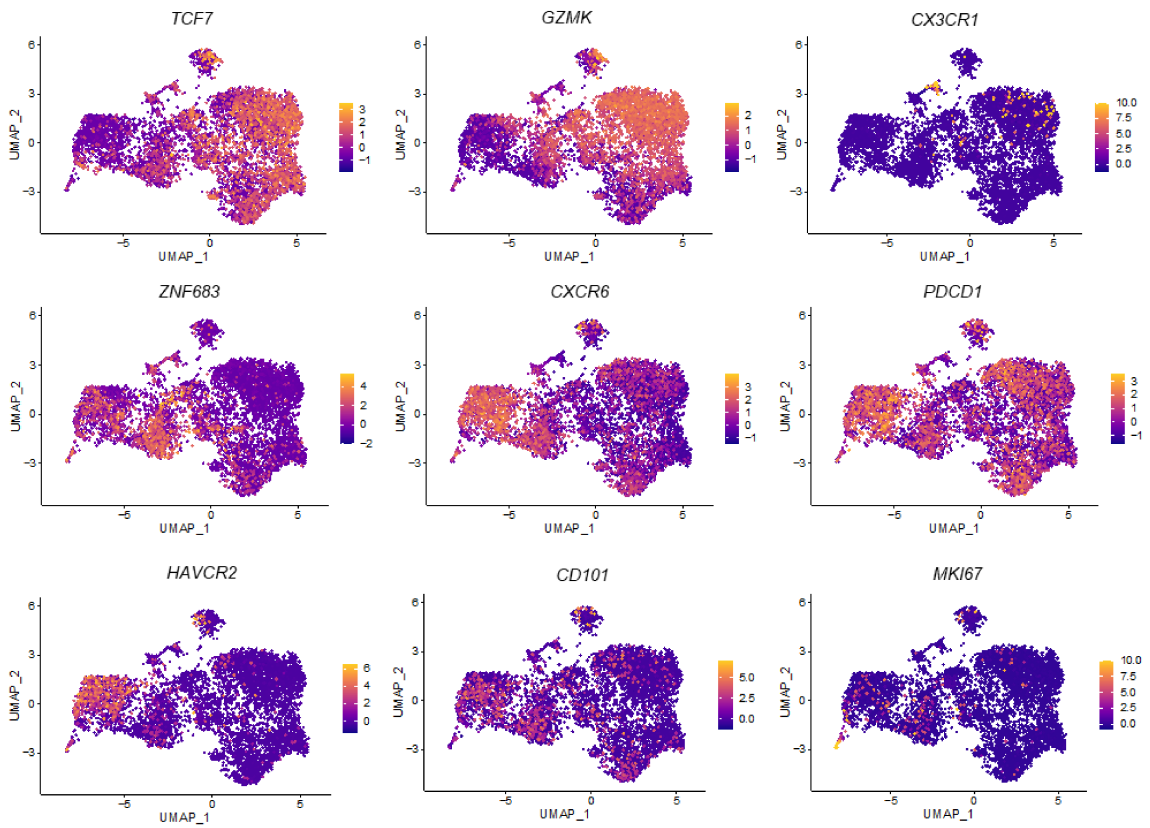**Supplementary Fig. S6. UMAPs of the distribution of differentiation marker genes.**

Log-normalized gene expression of *TCF7*, *GZMK*, *CX3CR1*, *ZNF683*, *CXCR6*, *PDCD1*, *HAVCR2*, *CD101*, and *MKI67* in a total 6,998 T cells from three patients were shown.
